# Supplementary material for: Socioeconomic differences in experiences with treatment of coronary heart disease: a qualitative study from the perspective of elderly patients
Source: PubMed Central journal article supplement — BMJ Open. 2018 Nov 13;8(11):e024151. doi: 10.1136/bmjopen-2018-024151 (PMC6252635; doi:10.1136/bmjopen-2018-024151), 2018-11-13
Supplement: bmjopen-2018-024151supp001.pdf [file bmjopen-2018-024151supp001.pdf]

## Interview Guide Baseline

| Key question                                                                                                                          | Concrete supplementary questions                                                                                                                                                                                                                                                                                                                                                                                                                                                                                                                     |
|---------------------------------------------------------------------------------------------------------------------------------------|------------------------------------------------------------------------------------------------------------------------------------------------------------------------------------------------------------------------------------------------------------------------------------------------------------------------------------------------------------------------------------------------------------------------------------------------------------------------------------------------------------------------------------------------------|
| Please begin by telling me about the medical history of your heart disease starting from the first symptoms until this hospital stay. | <ul style="list-style-type: none"> <li>- Have you ever been to a general practitioner/ cardiologist/ in a rehabilitation clinic before because of your heart disease?               <ul style="list-style-type: none"> <li>- How was your disease diagnosed?</li> <li>- Why are you currently in hospital?</li> </ul> </li> </ul>                                                                                                                                                                                                                    |
| Which positive and negative experiences have you made, concerning the care you have received?                                         | <ul style="list-style-type: none"> <li>- Can you think of any other positive or negative experience you have made with the hospital or office-based physicians?</li> <li>- Was there anything you were particularly satisfied with?</li> <li>- Was there anything you were unsatisfied with?</li> <li>- Have you experienced any problems with the further processing of the treatment?</li> <li>- How have you experienced talking with your physicians?</li> <li>- How was a decision reached about what treatment you were to receive?</li> </ul> |
| How would you describe the quality of your treatment?                                                                                 | <ul style="list-style-type: none"> <li>- How satisfied are you with your treatment?</li> <li>- Do you think that everyone in Germany is able to receive good treatment? Why do you think that is?</li> </ul>                                                                                                                                                                                                                                                                                                                                         |
| How do you manage your heart disease right now?                                                                                       | <ul style="list-style-type: none"> <li>- What will happen next?</li> <li>- What medical care do you expect to receive in the next months?</li> <li>- What hopes do you have for your health in the future?</li> <li>- Is there something else you would like to tell me?</li> </ul>                                                                                                                                                                                                                                                                  |

### Questions aimed at maintaining the conversational flow:

- Please tell me exactly how things went with...
- Could you perhaps give me a few more details?
- What happened next? / And after that?
- What else comes into your mind?
- What do you associate with ...?

## Interview Guide Follow Up

| Key question                                                                                                   | Concrete supplementary questions                                                                                                                                                                                                                                                                                                                                                                                                                                                                                                                                                                                                                                                           |
|----------------------------------------------------------------------------------------------------------------|--------------------------------------------------------------------------------------------------------------------------------------------------------------------------------------------------------------------------------------------------------------------------------------------------------------------------------------------------------------------------------------------------------------------------------------------------------------------------------------------------------------------------------------------------------------------------------------------------------------------------------------------------------------------------------------------|
| Please begin by telling me how the treatment of your heart disease has progressed after our last conversation. | <ul style="list-style-type: none"> <li>- Which doctors have you seen meanwhile, e.g. general practitioner (GP)/ cardiologist?</li> <li>- Have you been in a rehabilitation clinic or do you attend a heart training group?</li> <li>- What exactly has been done by each of the physicians (GP, cardiologist, hospital, rehabilitation)?               <ul style="list-style-type: none"> <li>- Which tasks of medical care have been taken care of by which doctor?</li> <li>- Who prescribes you heart drugs?</li> </ul> </li> </ul>                                                                                                                                                     |
| What positive and negative experiences have you made, concerning the treatment and care you have received?     | <ul style="list-style-type: none"> <li>- Can you think of any other experiences you have had with the GP/ cardiologist/ rehabilitation clinic?</li> <li>- Was there anything you were particularly satisfied or not satisfied with?</li> <li>- How does the cooperation between GP, specialists and the doctors at the hospital work?</li> <li>- Have you experienced any problems with the postoperative management and any further treatment after you have been discharged from hospital?</li> <li>- Have you had to actively arrange yourself to the further treatment?</li> <li>- Have you ever changed your GP or cardiologist and what have been the particular reasons?</li> </ul> |
| Last time we talked about your expectations of your medical care – to what extend were they fulfilled?         | <ul style="list-style-type: none"> <li>- Have your expectations changed during the course of treatment?</li> </ul>                                                                                                                                                                                                                                                                                                                                                                                                                                                                                                                                                                         |
| What kind of influence does your heart disease have on your everyday life?                                     | <ul style="list-style-type: none"> <li>- What kind of heart disease/s do you have?</li> <li>- How far is your everyday life constrained by your heart disease, and which tasks can't be managed by yourself anymore?</li> <li>- Who assists you in coping with the disease?</li> <li>- What do you personally contribute to a better health?</li> </ul>                                                                                                                                                                                                                                                                                                                                    |
| What will happen next?                                                                                         | <ul style="list-style-type: none"> <li>- What hopes do you have for your future health?</li> <li>- Is there something else you would like to tell me?</li> </ul>                                                                                                                                                                                                                                                                                                                                                                                                                                                                                                                           |

### Questions aimed at maintaining the conversational flow:

- |                                                                                                                                                                                                              |                                                                                                                                |
|--------------------------------------------------------------------------------------------------------------------------------------------------------------------------------------------------------------|--------------------------------------------------------------------------------------------------------------------------------|
| <ul style="list-style-type: none"> <li>- Please tell me exactly how things went with...</li> <li>- Could you perhaps give me a few more details?</li> <li>- What happened next? / And after that?</li> </ul> | <ul style="list-style-type: none"> <li>- What else comes into your mind?</li> <li>- What do you associate with ...?</li> </ul> |
|--------------------------------------------------------------------------------------------------------------------------------------------------------------------------------------------------------------|--------------------------------------------------------------------------------------------------------------------------------|
